# Supplementary material for: Quantitative multiplexed proteomics of Taenia solium cysts obtained from the skeletal muscle and central nervous system of pigs
Source: PubMed Central journal article supplement (PMC5634658; doi:10.1371/journal.pntd.0005962), 2017-09-25
Supplement: pntd.0005962.s007.pdf [file pntd.0005962.s007.pdf]

| Name                             | Organism | Cat #    | Isotype | Clonality  | Reacts with                                                                 |
|----------------------------------|----------|----------|---------|------------|-----------------------------------------------------------------------------|
| Anti-albumin                     | sheep    | ab186525 | IgG     | polyclonal | mouse, rat, horse,rabbit, chicken, guinea pig,<br>cow, cat, dog, human, pig |
| Anti-hemoglobin                  | goat     | ab19362  | IgG     | polyclonal | human                                                                       |
| Rabbit anti-sheep IgG            | rabbit   | ab6747   | IgG     | polyclonal |                                                                             |
| Anti-haptoglobin                 | sheep    | ab8968   | IgG     | polyclonal | mouse, rat, rabbit, goat,horse,<br>cat,dog,human,pig                        |
| Anti-hemaoglobin subunit epsilon | rabbit   | ab136624 | IgG     | polyclonal | rat                                                                         |
| Anti-hemopexin                   | rabbit   | ab133415 | IgG     | polyclonal | mouse, rat                                                                  |
| Donkey anti-rabbit IgG           | Donkey   | ab6802   | IgG     | polyclonal |                                                                             |
| Anti-LDL                         | Chicken  | ab157795 | IgY     | polyclonal | human                                                                       |
| Goat anti-chicken IgY            | goat     | ab6877   | IgG     | polyclonal | chicken                                                                     |
| Anti-hepcidin-25                 | rabbit   | ab75883  | IgG     | polyclonal |                                                                             |
| Anti-ferritin light chain        | rabbit   | ab69090  | IgG     | polyclonal | mouse, rat, dog, human                                                      |
